# Supplementary material for: Kinetics and mechanisms of formation of the lanthanide(III)-trans-1,2-diaminocyclohexane-N,N,N ′,N′-tetraacetate complexes †
Source: Royal Society of Chemistry journal article supplement (doi:10.1039/b003143g), 2000-01-01
Supplement: b003143g-s1.doc [file b003143g-s1.doc]

**Figure S1** Rates of formation of Eu(DCTA)- ([Eu3+]=9x10-4 M, [DCTA]=0.0225 M, 25 oC)
