# Supplementary material for: Kinetics and mechanisms of formation of the lanthanide(III)-trans-1,2-diaminocyclohexane-N,N,N ′,N′-tetraacetate complexes †
Source: Royal Society of Chemistry journal article supplement (doi:10.1039/b003143g), 2000-01-01
Supplement: b003143g-s2.doc [file b003143g-s2.doc]

**Figure S2** Rates of formation of Yb(DCTA)- ([Yb3+]=5x10-4 M, [DCTA]=1.25x10-2 M, 25 oC)
