# Supplementary material for: Kinetics and mechanisms of formation of the lanthanide(III)-trans-1,2-diaminocyclohexane-N,N,N ′,N′-tetraacetate complexes †
Source: Royal Society of Chemistry journal article supplement (doi:10.1039/b003143g), 2000-01-01
Supplement: b003143g.doc [file b003143g.doc]

**Table S1** First-order rate constants (kobs (s-1)) for the formation of Ce(DCTA)-

([Ce3+]=6x10-4 M, 25oC)

| **cL (M)** | **pH=4.04** | **pH=4.60** | **pH=5.08** |
| --- | --- | --- | --- |
| 0.0006 | 1.76 | 3.90 | 8.20 |
| 0.0006 | 1.78 | 3.94 | 8.25 |
| 0.0012 | 3.62 | 7.81 | 13.16 |
| 0.0012 | 3.59 | 7.77 | 13.09 |
| 0.0018 | 5.04 | 9.70 | 15.29 |
| 0.0018 | 5.19 | 9.67 | 14.86 |
| 0.003 | 6.59 | 11.42 | 15.33 |
| 0.003 | 6.53 | 11.12 | 15.48 |
| 0.006 | 8.10 | 11.85 | 16.10 |
| 0.006 | 8.10 | 12.12 |  |
| 0.012 | 8.82 | 12.55 |  |
| 0.012 | 8.75 |  |  |

**Table S2** Rate constants (kr (s-1)) for the formation of Ce(DCTA)- ([Ce3+]=5x10-4 M, [DCTA]=1.25x10-2 M, 25oC)

| **pH** | **kr (s-1)** | **pH** | **kr (s-1)** |
| --- | --- | --- | --- |
| 3.56 | 4.57 | 5.33 | 16.12 |
| 3.56 | 4.49 | 5.56 | 17.03 |
| 3.77 | 5.98 | 5.56 | 17.25 |
| 3.77 | 5.97 | 5.87 | 19.95 |
| 4.03 | 7.78 | 5.87 | 20.48 |
| 4.03 | 8.29 | 6.02 | 21.63 |
| 4.11 | 8.57 | 6.02 | 22.19 |
| 4.11 | 8.62 | 6.24 | 26.77 |
| 4.36 | 10.44 | 6.24 | 26.08 |
| 4.36 | 10.46 | 6.45 | 32.67 |
| 4.45 | 10.94 | 6.45 | 32.86 |
| 4.45 | 11.02 | 6.62 | 44.61 |
| 4.65 | 12.44 | 6.62 | 45.41 |
| 4.65 | 12.78 | 6.86 | 58.64 |
| 4.85 | 13.52 | 6.86 | 58.36 |
| 4.85 | 13.98 | 7.04 | 89.3 |
| 4.95 | 15.08 | 7.04 | 90.03 |
| 4.95 | 14.86 | 7.16 | 114.8 |
| 5.33 | 16.29 | 7.16 | 114.3 |

**Table S3** Rate constants (kr (s-1)) for the formation of Eu(DCTA)- ([Eu3+]=9x10-4 M, [DCTA]=0.0225 M, 25oC)

| **pH** | **kr (s-1)** | **pH** | **kr (s-1)** |
| --- | --- | --- | --- |
| 3.74 | 8.08 | 5.31 | 31.46 |
| 3.74 | 8.16 | 5.41 | 36.12 |
| 3.98 | 11.66 | 5.41 | 35.98 |
| 3.98 | 11.42 | 5.63 | 41.77 |
| 4.23 | 12.99 | 5.63 | 40.95 |
| 4.23 | 13.61 | 5.84 | 48.60 |
| 4.43 | 16.71 | 5.84 | 48.20 |
| 4.43 | 16.07 | 6.05 | 58.20 |
| 4.63 | 19.63 | 6.05 | 58.50 |
| 4.63 | 19.81 | 6.26 | 76.50 |
| 4.84 | 21.48 | 6.26 | 75.10 |
| 4.84 | 21.85 | 6.46 | 92.55 |
| 5.03 | 22.61 | 6.46 | 92.88 |
| 5.03 | 23.57 | 6.66 | 121.90 |
| 5.24 | 29.64 | 6.66 | 116.20 |
| 5.24 | 28.63 | 6.86 | 165 |
| 5.31 | 33.02 | 6.86 | 174.80 |

**Table S4** Rate constants (kr (s-1)) for the formation of Yb(DCTA)- ([Yb3+]=5x10-4 M, [DCTA]=1.25x10-2 M, 25oC)

| **pH** | **kr (s-1)** |
| --- | --- |
| 3.53 | 49.54 |
| 3.53 | 51.31 |
| 3.78 | 70.09 |
| 3.78 | 67.09 |
| 3.98 | 81.13 |
| 3.98 | 75.88 |
| 4.31 | 107.10 |
| 4.31 | 106.70 |
| 4.42 | 112.30 |
| 4.42 | 115.20 |
| 4.67 | 128.20 |
| 4.67 | 125.60 |

**Table S5** Dependence of first order rate constants (kr (s-1)) on the concentration of the basic forms of the buffers formic acid at pH=4.06 and N-methylpiperazine at pH=4.49 (Ce3+=4x10-4 M, DCTA=4x10-3 M, 1.0 M KCl, 25oC)

| **cB (M)** | **pH=4.06** | **pH=4.49** |
| --- | --- | --- |
| 0.014 |  | 9.49 |
| 0.014 |  | 9.24 |
| 0.0182 |  | 9.94 |
| 0.0182 |  | 9.49 |
| 0.0224 |  | 9.58 |
| 0.0224 |  | 10.24 |
| 0.028 |  | 9.89 |
| 0.028 |  | 9.50 |
| 0.0336 |  | 10.09 |
| 0.0336 |  | 9.57 |
| 0.0067 | 6.51 |  |
| 0.0067 | 6.69 |  |
| 0.0134 | 6.70 |  |
| 0.0134 | 6.82 |  |
| 0.0201 | 6.80 |  |
| 0.0201 | 6.82 |  |
| 0.0268 | 6.92 |  |
| 0.0268 | 6.82 |  |
| 0.0335 | 6.66 |  |
| 0.0335 | 6.79 |  |

**Table S6** Temperature dependence of the rate constants (kLnHL) and the protonation constants () for the formation of Ce(DCTA)-([Ce3+]=5x10-4 M, [DCTA]=25x[Ce3+], 1.0 M KCl)

| **T (K)** | **ln (kLnHL/T)** | **ln** |
| --- | --- | --- |
| 283 | -3.77 | 10.31 |
| 288 | -3.28 | 9.94 |
| 293 | -2.83 | 9.56 |
| 298 | -2.45 | 8.88 |
| 303 | -1.96 | 8.66 |
| 308 | -1.55 | 9.28 |

**Table S7** Temperature dependence of the rate constants (kLnHL) and the protonation constants () for the formation of Eu(DCTA)- ([Eu3+]=9x10-4 M, [DCTA]=25x[Eu3+], 1.0 M KCl)

| **T (K)** | **ln (kLnHL/T)** | **ln** |
| --- | --- | --- |
| 283 | -4.32 | 10.61 |
| 288 | -3.90 | 10.25 |
| 293 | -3.41 | 10.05 |
| 298 | -2.93 | 9.43 |
| 303 | -2.57 | 9.23 |
| 308 | -2.08 | 9.60 |
